# Supplementary material for: Improvement in Grain Size Distribution Uniformity for Nuclear-Grade Austenitic Stainless Steel through Thermomechanical Treatment
Source: MDPI journal article supplement (doi:10.3390/ma17102313), 2024-05-14
Supplement: s1 [file s1]

– Supporting Information –

# Improvement in Grain Size Distribution Uniformity for Nuclear-Grade Austenitic Stainless Steel through Thermomechanical Treatment

Yong Wang, Weiwei Xue, Zongxu Pang, Zichen Zhao, Zhuohua Liu, Chenyuan Liu,  
Fei Gao and Weijuan Li

**Figure S1**

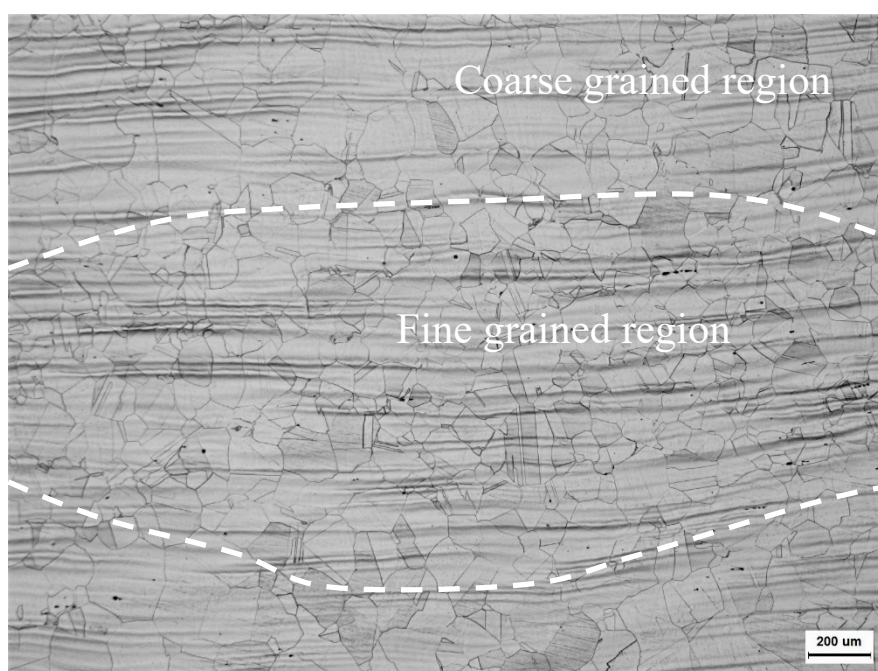

Figure S1 Microstructure of the initial hot rolled plate subjected to solution treatment
